# Supplementary material for: Co-continuous structural effect of size-controlled macro-porous glass membrane on extracellular vesicle collection for the analysis of miRNA
Source: PubMed Central journal article supplement (PMC8060318; doi:10.1038/s41598-021-87986-2), 2021-04-21
Supplement: 41598_2021_87986_MOESM1_ESM.pdf [file 41598_2021_87986_MOESM1_ESM.pdf]

## Supplementary Information

Co-continuous structural effect of size-controlled macro-porous glass membrane on extracellular vesicle collection for the analysis of miRNA

Hiroshi Yukawa <sup>1,2,3,4</sup>\*, Shuji Yamazaki <sup>5</sup>, Keita Aoki <sup>2</sup>, Kengo Muto <sup>2</sup>, Naoto Kihara <sup>5</sup>, Kazuhide Sato <sup>1,4,6</sup>, Daisuke Onoshima <sup>1</sup>, Takahiro Ochiya <sup>7</sup>, Yasuhito Tanaka <sup>8</sup>, and Yoshinobu Baba <sup>1,2,3,9\*</sup>

### \* Address correspondence to

Hiroshi Yukawa

Institute of Nano-Life-Systems, Institutes of Innovation for Future Society, Nagoya University, Furo-cho, Chikusa-ku, Nagoya 464-8603, Japan.

Tel.: ++81-52-789-5654; Fax. : ++81-52-789-5177

E-mail: [h.yukawa@nanobio.nagoya-u.ac.jp](mailto:h.yukawa@nanobio.nagoya-u.ac.jp)

Yoshinobu Baba

Department of Biomolecular Engineering, Graduate School of Engineering, Nagoya University, Furo-cho, Chikusa-ku, Nagoya 464-8603, Japan.

Tel.: ++81-52-789-4664; Fax. : ++81-52-789-4666

E-mail: [babaymtt@chembio.nagoya-u.ac.jp](mailto:babaymtt@chembio.nagoya-u.ac.jp)

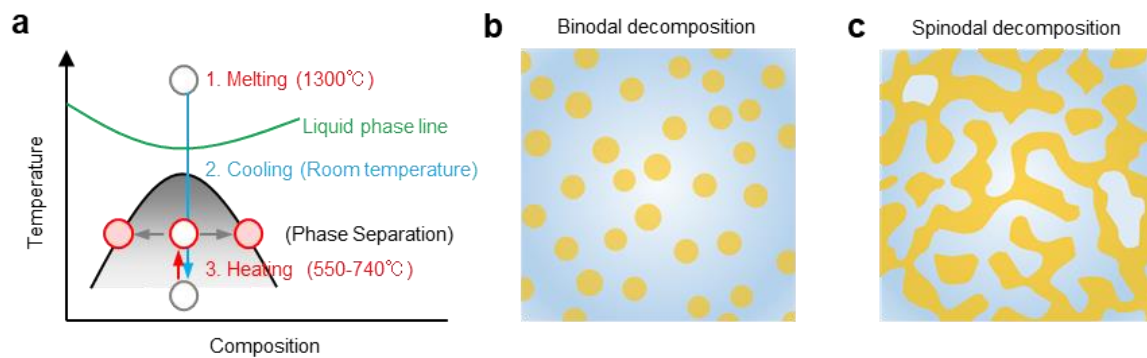

**Supplementary Figure 1.** Phase diagram (a) and decomposition (b,c) of  $\text{SiO}_2\text{-B}_2\text{O}_3\text{-Na}_2\text{O}$ -based glass.

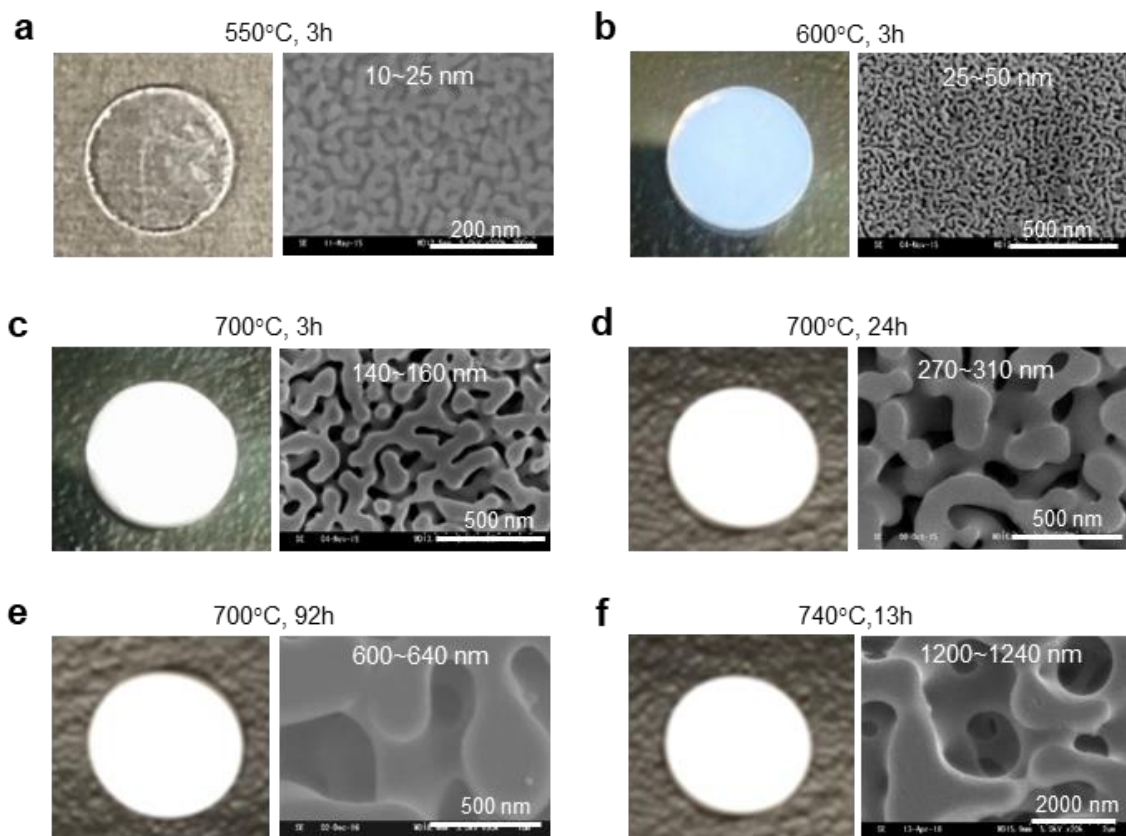

**Supplementary Figure 2.** Photograph and TEM images of size-controlled macro-porous glass (MPG) membranes; (a) heating temperature: 550°C, heating time: 3 h. (b) 600°C, 3 h. (c) 700°C, 3 h. (d) 700°C, 24 h. (e) 700°C, 92 h. (f) 740°C, 13h

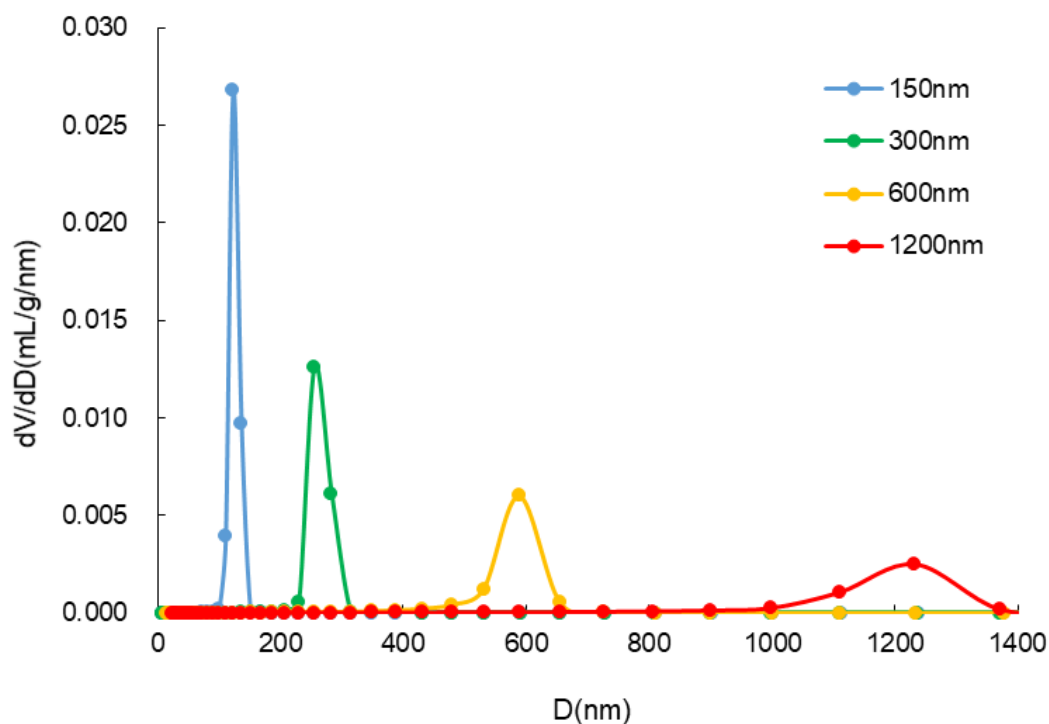

**Supplementary Figure 3.** Pore size distribution (nm) of MPG membranes ( $\Phi$ 150 nm,  $\Phi$ 300 nm,  $\Phi$ 600 nm,  $\Phi$ 1200 nm shown as Figure S2c~f) by using a mercury instruction porosimetry.

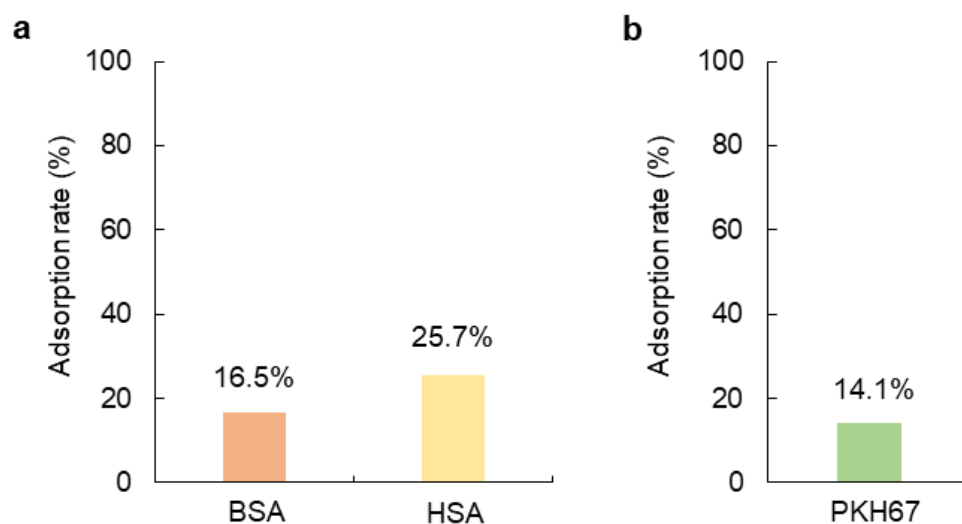

**Supplementary Figure 4.** The adsorption rate (%) of bovine serum albumin (BSA) and human serum albumin (HAS) (a), and fluorescent reagent (PKH67) (b) in a PEG coated MPG membrane (pore-size:  $\Phi$ 600 nm, thickness: 1mm)

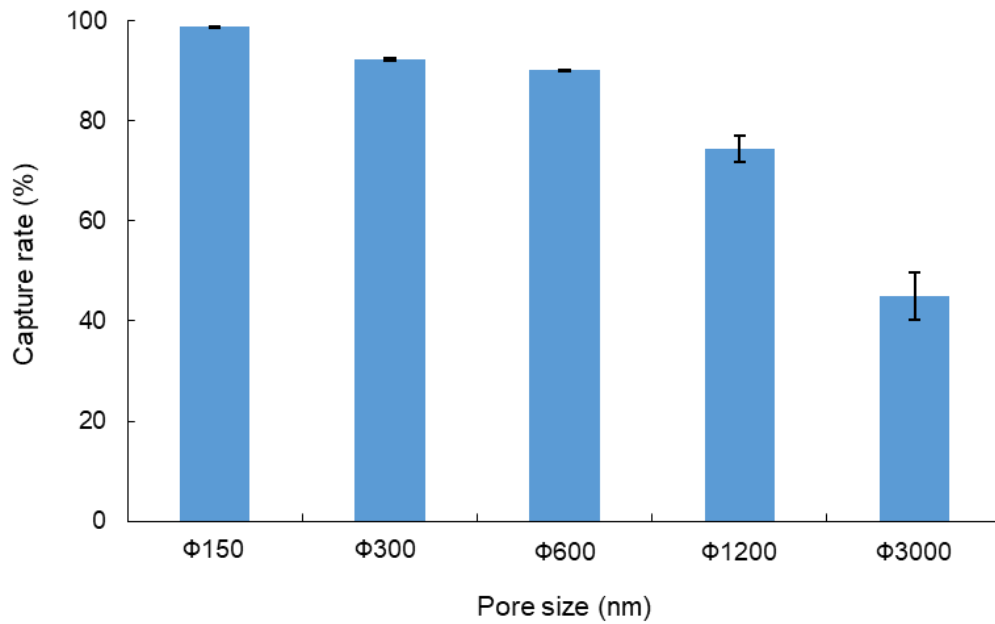

**Supplementary Figure 5.** The capture rate (%) of HepG2-EVs in PEG coated MPG membranes (pore-size:  $\Phi 150$  nm,  $\Phi 300$  nm,  $\Phi 600$  nm,  $\Phi 1200$  nm, and  $\Phi 3000$  nm; thickness: 1 mm).

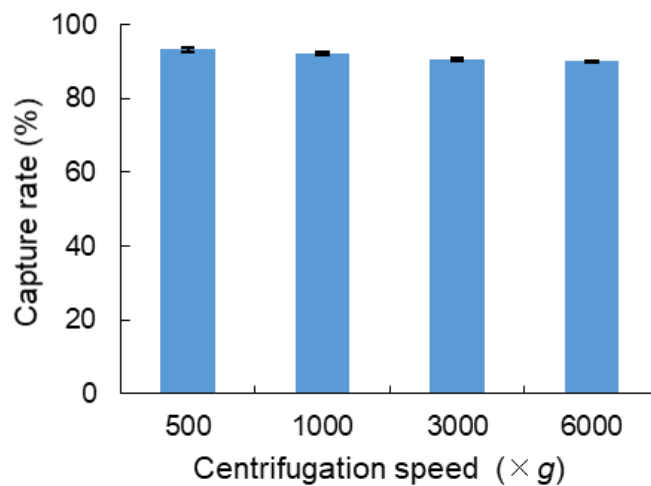

**Supplementary Figure 6.** The capture rate (%) of HepG2-EVs in a PEG coated MPG membrane (pore-size:  $\Phi 600$  nm, thickness: 1 mm) by changes of centrifugation speed (500  $\times g$ , 1000  $\times g$ , 3000  $\times g$ , and 6000  $\times g$ ).

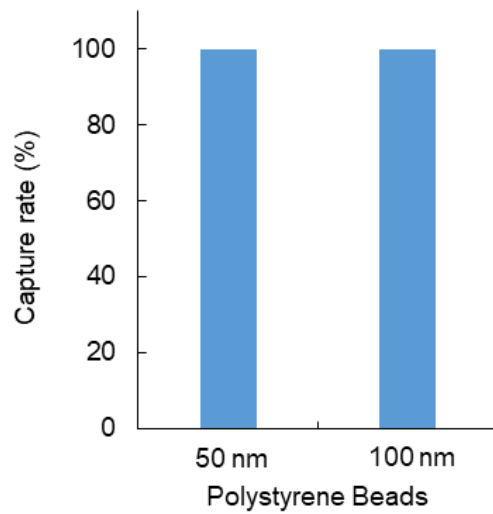

**Supplementary Figure 7.** The capture rate (%) of polystyrene beads (diameter: 50 nm and 100 nm) in a PEG coated MPG membrane (pore-size:  $\Phi$ 600 nm, thickness: 1 mm).

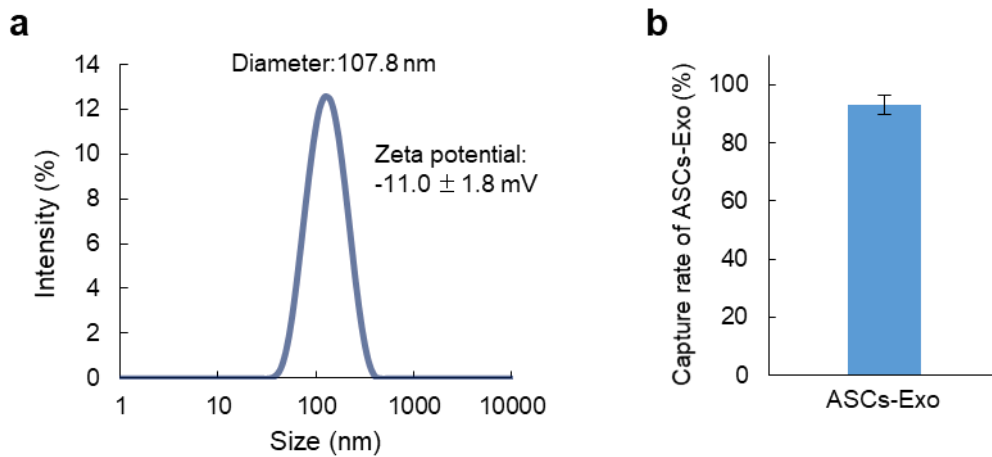

**Supplementary Figure 8.** (a) The size distribution and zeta potential of EVs collected from the cell culture supernatant of adipose-tissue derived stem cells (ASCs-EVs). (b) The capture rate (%) of ASCs-EVs in a PEG coated MPG membrane (pore-size:  $\Phi$ 600 nm, thickness: 1 mm).

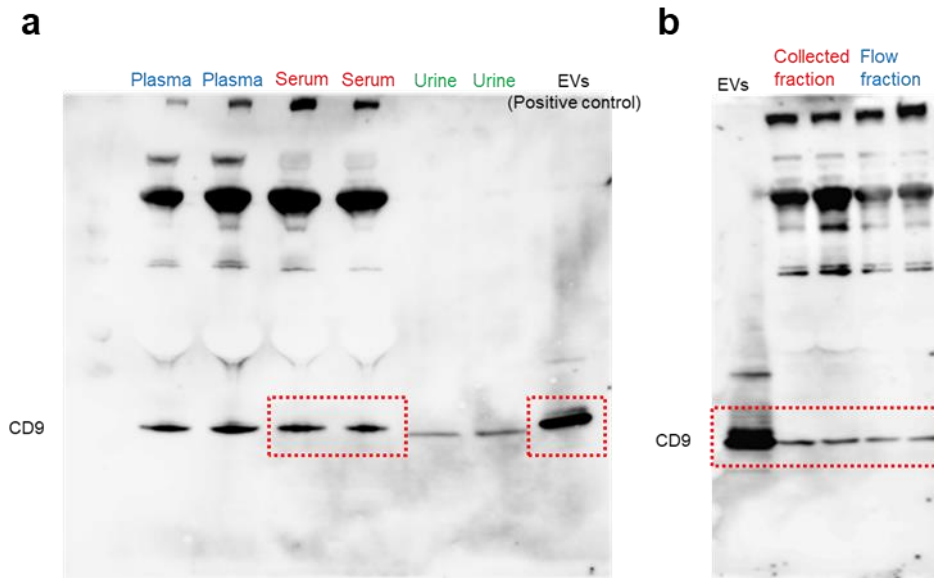

**Supplementary Figure 9.** (a) The western blotting of CD9 in plasma, serum, and urine showed as full-length gels and blots. (b) The western blotting of CD9 in the collected and flow fraction of serum treated by AGC device showed as full-length gels and blots. The areas represented by red dot lines were shown in main manuscript.

**Supplementary Table 1.** The time required for centrifugation to collect EVs in the AGC device under various conditions.

|                      |                     | Centrifugation Speed |          |          |          |
|----------------------|---------------------|----------------------|----------|----------|----------|
|                      |                     | 500 × g              | 1000 × g | 3000 × g | 6000 × g |
| Thickness<br>1 mm    | Φ150 nm             | > 5 min              | > 5 min  | > 5 min  | > 5 min  |
|                      | Φ300 nm             | > 5 min              | > 5 min  | > 5 min  | > 5 min  |
|                      | Φ600 nm             | > 5 min              | < 3 min  | < 1 min  | < 30 s   |
|                      | Φ1200 nm            | < 3 min              | < 1 min  | < 15 s   | < 15 s   |
|                      |                     | Centrifugation Speed |          |          |          |
|                      |                     | 500 × g              | 1000 × g | 3000 × g | 6000 × g |
| Pore-size<br>Φ600 nm | Thickness<br>0.5 mm | < 3 min              | < 1 min  | < 1 min  | < 15 s   |
|                      | 0.8 mm              | < 3 min              | < 3 min  | < 1 min  | < 15 s   |
|                      | 1.0 mm              | > 5 min              | < 3 min  | < 1 min  | < 30 s   |
